# Supplementary material for: Quantifying the extent of morphological homoplasy: A phylogenetic analysis of 490 characters in Drosophila
Source: PubMed Central journal article supplement (PMC6546384; doi:10.1002/evl3.115), 2019-04-22

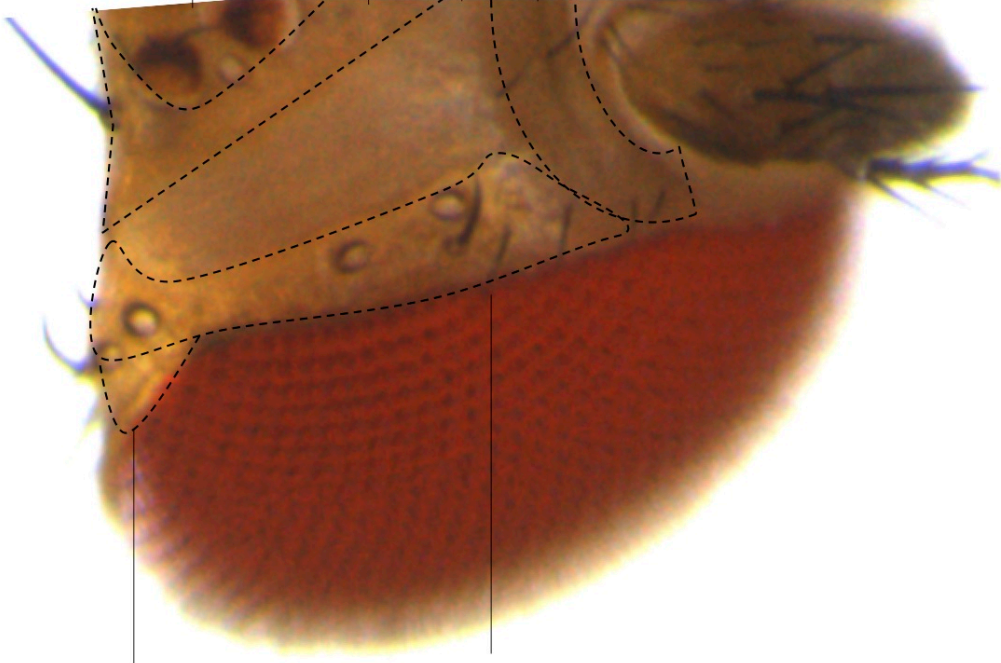

Frons corners

Orbital plates

Ocellar triangle

Frontal triangle

Frons upper color

Frons lower color

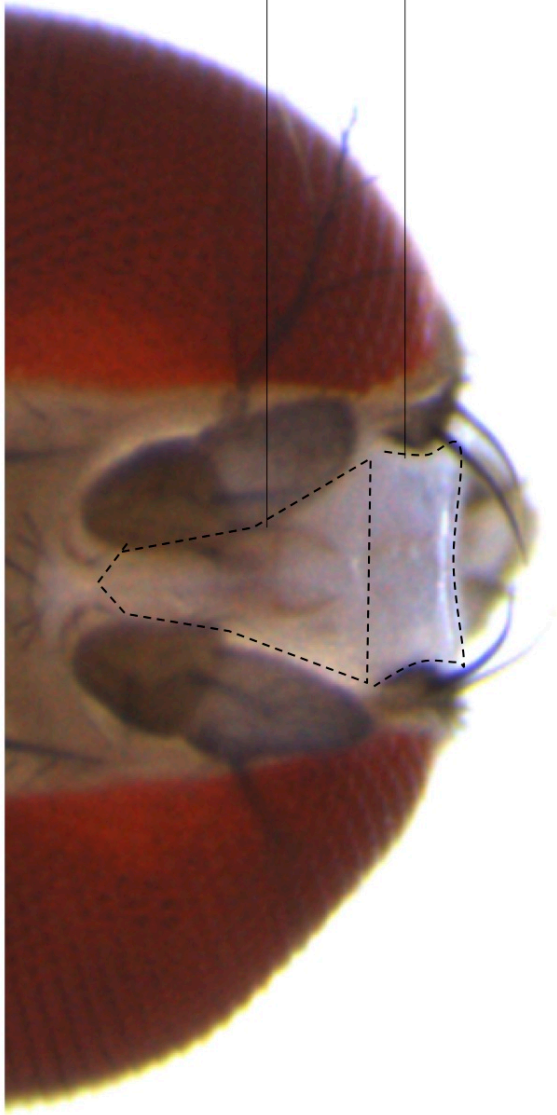

Face upper region

Face lower region

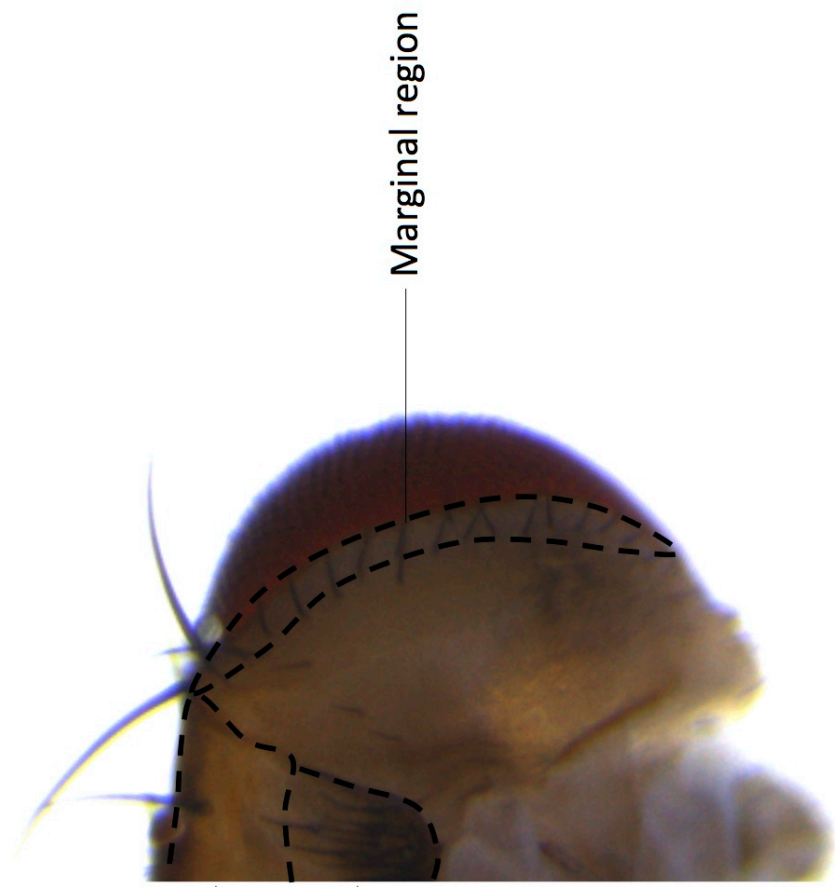

Medial region

Above the foramen region

Marginal region

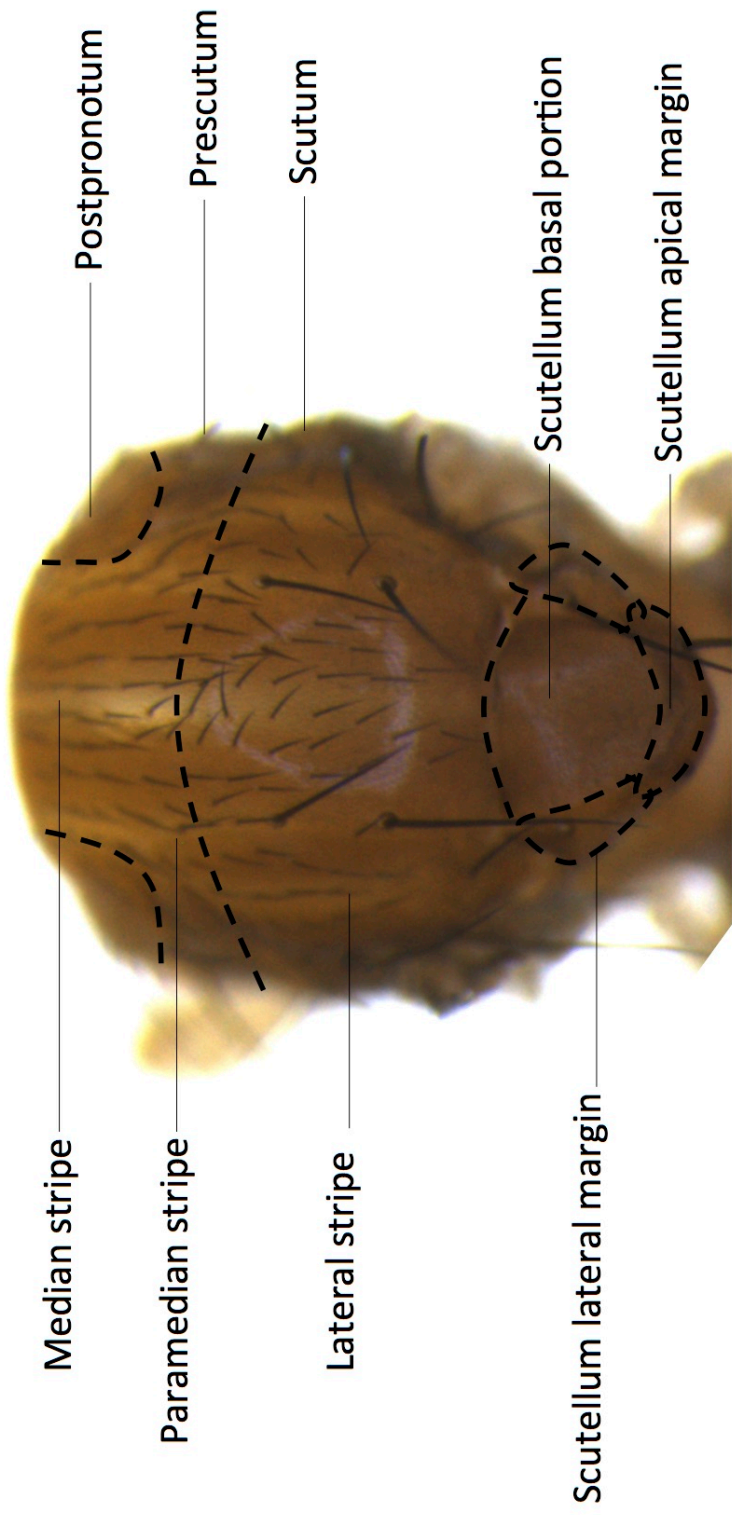

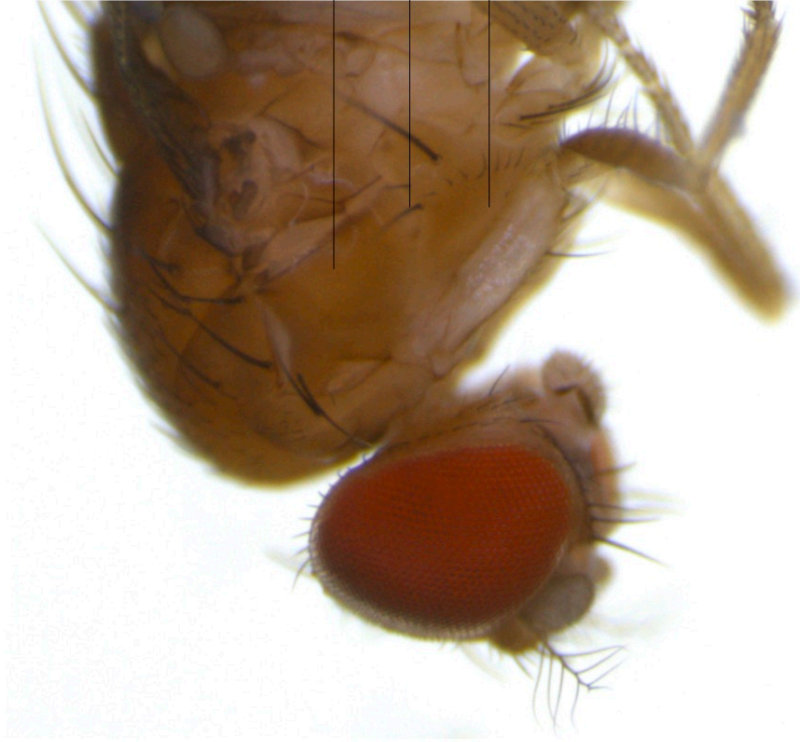

Mesopleuron (upper half)

Mesopleuron stripe

Mesopleuron (lower half)

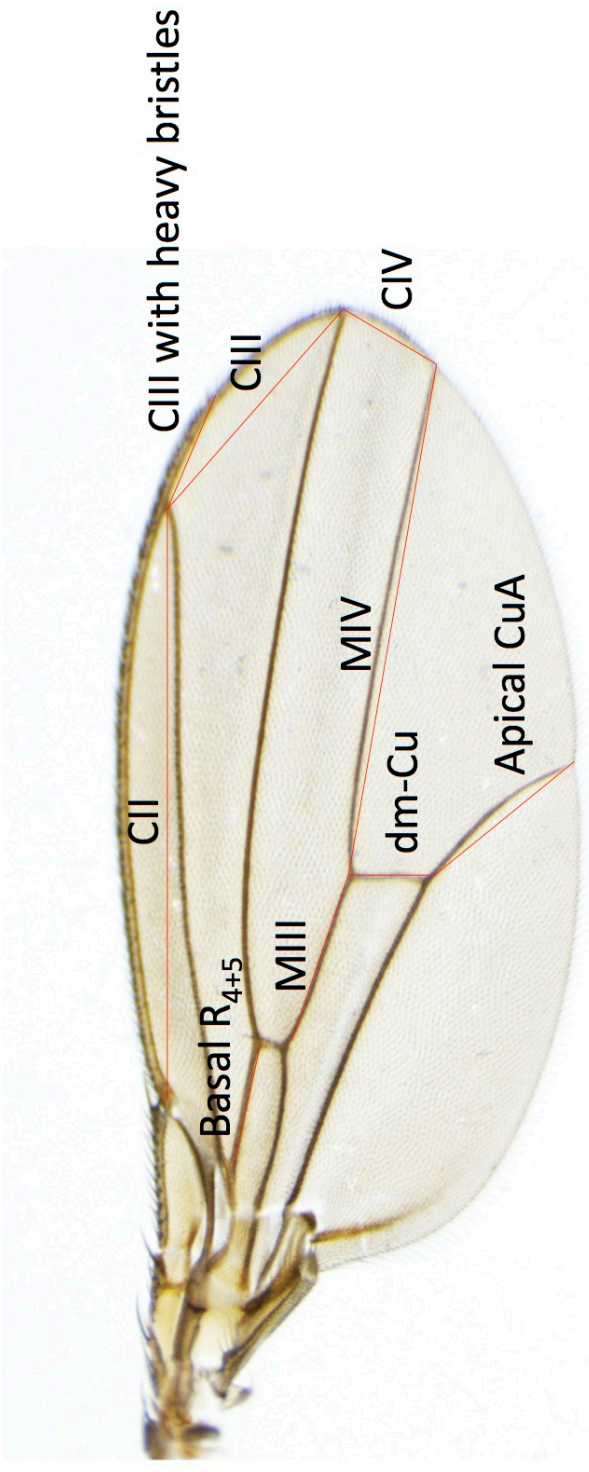

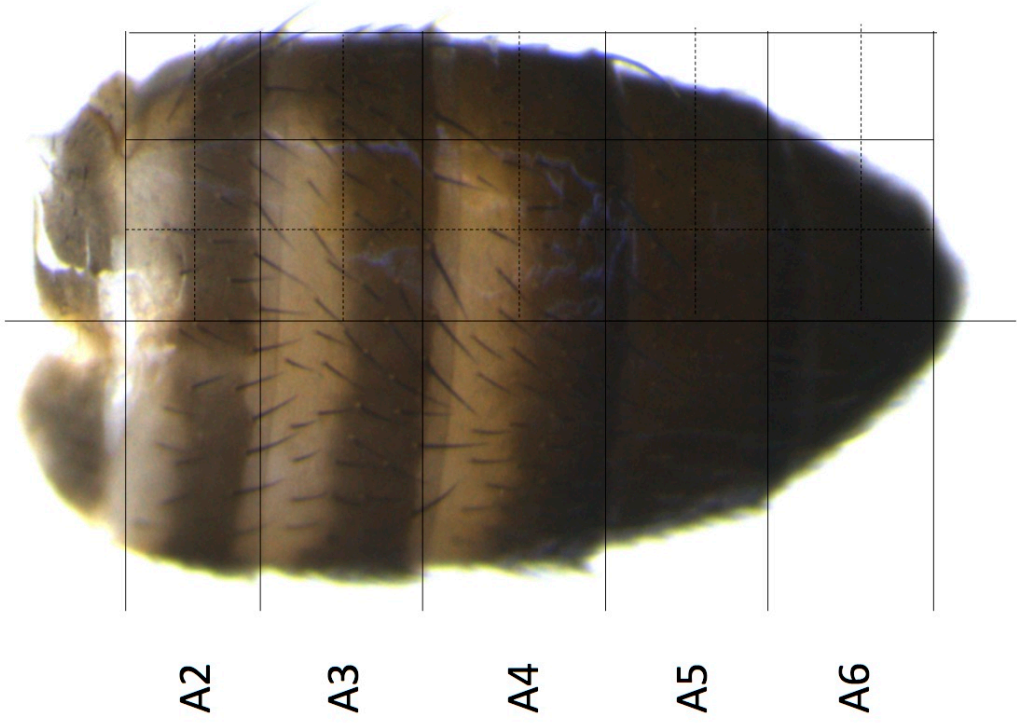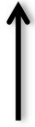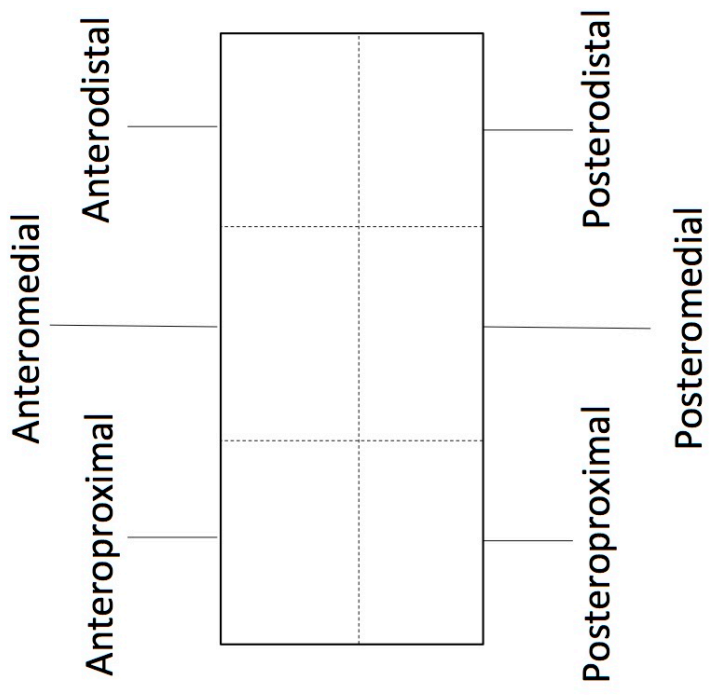

Supplement: EVL3-3-286-s001.pdf [file EVL3-3-286-s001.pdf]
